# Supplementary material for: Assessment of Genetic Parameters and Gene Action Associated with Heterosis for Enhancing Yield Characters in Novel Hybrid Rice Parental Lines
Source: MDPI journal article supplement (doi:10.3390/plants11030266), 2022-01-19
Supplement: s1 [file s1]

**Table S1.** Mean performance for grain yield and its contributing traits for lines, testers and their crosses.

|    | Genotypes            | Days to Heading | Plant Height (cm) | Chlorophyll Content (SPAD) | Flag Leaf Angle (o) | Flag Leaf Area (cm <sup>2</sup> ) | Panicle Exsertion (%) | Panicle Length (cm) | Number of Panicles Plant <sup>-1</sup> | Panicle Weight (g) | 1000-Grain Weight (g) | Fertility (%) | Grain Yield t ha <sup>-1</sup> | Grain Type | Apparent Heteroses | Phenotypic Acceptability |
|----|----------------------|-----------------|-------------------|----------------------------|---------------------|-----------------------------------|-----------------------|---------------------|----------------------------------------|--------------------|-----------------------|---------------|--------------------------------|------------|--------------------|--------------------------|
| 1  | Quan-9311A           | 75.24           | 85.27             | 40.03                      | 19.87               | 84.37                             | 100.00                | 30.50               | 9.00                                   | 1.52               | 22.1                  | 92.00         | 2.71                           | 8.03       | 6.03               | 7.04                     |
| 2  | Guang8A              | 72.23           | 76.24             | 40.03                      | 23.15               | 36.26                             | 87.99                 | 26.00               | 7.33                                   | 0.97               | 20.1                  | 85.00         | 2.81                           | 7.52       | 4.02               | 6.03                     |
| 3  | Heng Feng A          | 76.24           | 82.26             | 43.03                      | 41.37               | 35.04                             | 86.98                 | 26.00               | 7.67                                   | 1.17               | 20.1                  | 87.50         | 2.91                           | 8.53       | 4.02               | 6.03                     |
| 4  | II-32A               | 92.29           | 84.26             | 40.03                      | 30.20               | 43.13                             | 83.94                 | 19.50               | 8.67                                   | 1.33               | 21.1                  | 91.00         | 3.01                           | 5.02       | 5.03               | 6.03                     |
| 5  | Quanxiang 9A         | 78.24           | 83.26             | 42.03                      | 40.03               | 42.37                             | 85.97                 | 28.33               | 8.00                                   | 1.21               | 21.1                  | 89.00         | 3.01                           | 7.92       | 5.03               | 6.03                     |
| 6  | Giza179              | 65.11           | 99.00             | 35.53                      | 24.80               | 70.37                             | 100.00                | 25.17               | 10.00                                  | 2.11               | 26.1                  | 79.82         | 7.40                           | 5.13       | 7.04               | 8.04                     |
| 7  | Giza181              | 89.77           | 113.00            | 41.03                      | 6.63                | 60.27                             | 100.00                | 27.85               | 9.06                                   | 1.62               | 22.1                  | 69.85         | 5.43                           | 8.88       | 6.03               | 7.04                     |
| 8  | Giza182              | 74.23           | 96.67             | 40.03                      | 13.23               | 53.23                             | 100.00                | 24.67               | 10.00                                  | 1.99               | 25.1                  | 76.83         | 6.91                           | 8.38       | 6.03               | 8.04                     |
| 9  | GZ5121               | 76.24           | 108.00            | 40.03                      | 21.50               | 77.10                             | 100.00                | 26.67               | 9.57                                   | 1.69               | 24.1                  | 74.83         | 5.92                           | 3.95       | 6.03               | 7.04                     |
| 10 | Quan-9311A × Giza181 | 87.11           | 108.33            | 42.63                      | 18.20               | 64.87                             | 99.11                 | 27.00               | 12.33                                  | 3.89               | 26.7                  | 89.80         | 9.86                           | 7.40       | 8.04               | 8.04                     |
| 11 | Quan-9311A × Giza182 | 85.13           | 118.00            | 40.60                      | 21.50               | 84.13                             | 99.40                 | 28.83               | 11.75                                  | 3.57               | 26.1                  | 87.81         | 9.40                           | 7.69       | 8.04               | 8.04                     |
| 12 | Quan-9311A × Giza179 | 86.27           | 115.59            | 38.57                      | 23.13               | 77.50                             | 100.00                | 28.00               | 17.33                                  | 5.77               | 28.1                  | 93.79         | 13.26                          | 6.63       | 9.05               | 9.05                     |
| 13 | Quan-9311A × GZ5121  | 91.29           | 122.45            | 42.03                      | 10.07               | 29.40                             | 100.00                | 29.86               | 7.00                                   | 0.83               | 17.1                  | 10.00         | 0.32                           | 4.61       | 3.02               | 5.03                     |
| 14 | Guang8A×Giza179      | 76.24           | 116.33            | 39.03                      | 29.77               | 69.50                             | 99.11                 | 28.33               | 10.00                                  | 1.87               | 24.5                  | 74.83         | 6.02                           | 8.03       | 6.03               | 7.04                     |
| 15 | Guang8A×Giza181      | 92.83           | 132.67            | 38.03                      | 13.23               | 91.20                             | 98.10                 | 31.33               | 13.75                                  | 4.39               | 27.5                  | 91.80         | 12.04                          | 8.23       | 9.05               | 9.05                     |
| 16 | Guang8A×Giza182      | 80.54           | 114.67            | 41.62                      | 25.16               | 55.48                             | 100.00                | 28.00               | 10.67                                  | 2.87               | 26.1                  | 84.81         | 9.03                           | 8.53       | 8.04               | 8.04                     |
| 17 | Guang8A×GZ5121       | 80.84           | 109.33            | 37.56                      | 13.23               | 82.77                             | 97.09                 | 27.00               | 12.00                                  | 3.66               | 26.7                  | 87.81         | 9.50                           | 4.31       | 8.04               | 8.04                     |
| 18 | Heng Feng A×Giza179  | 78.86           | 104.63            | 35.53                      | 16.53               | 59.43                             | 100.00                | 25.50               | 12.67                                  | 4.00               | 27.1                  | 89.80         | 10.03                          | 4.71       | 8.04               | 8.04                     |
| 19 | Heng Feng A×Giza181  | 95.30           | 110.00            | 36.54                      | 11.07               | 65.67                             | 100.00                | 27.00               | 11.67                                  | 3.51               | 26.1                  | 87.81         | 9.26                           | 7.82       | 8.04               | 8.04                     |
| 20 | Heng Feng A×Giza182  | 79.19           | 111.12            | 40.03                      | 18.20               | 70.97                             | 99.40                 | 27.70               | 13.33                                  | 4.33               | 27.1                  | 89.80         | 10.53                          | 6.42       | 9.05               | 9.05                     |
| 21 | Heng Feng A×GZ5121   | 81.17           | 102.67            | 34.02                      | 21.57               | 71.87                             | 99.11                 | 25.33               | 11.00                                  | 3.27               | 26.1                  | 86.81         | 9.11                           | 6.02       | 8.04               | 8.04                     |
| 22 | II-32A×Giza179       | 83.15           | 123.00            | 38.57                      | 21.53               | 70.07                             | 99.40                 | 30.20               | 14.09                                  | 4.63               | 27.7                  | 91.80         | 12.04                          | 5.22       | 9.05               | 9.05                     |
| 23 | II-32A×Giza181       | 89.09           | 114.33            | 39.59                      | 35.23               | 71.45                             | 100.00                | 28.00               | 15.19                                  | 4.87               | 28.1                  | 92.80         | 13.04                          | 8.03       | 9.05               | 9.05                     |
| 24 | II-32A×Giza182       | 86.58           | 119.67            | 40.60                      | 31.47               | 75.53                             | 96.08                 | 29.17               | 10.67                                  | 3.17               | 26.1                  | 84.81         | 9.03                           | 8.23       | 8.04               | 8.04                     |
| 25 | II-32A×GZ5121        | 83.56           | 107.00            | 37.56                      | 18.20               | 56.17                             | 100.00                | 26.33               | 10.00                                  | 2.25               | 26.1                  | 79.82         | 8.53                           | 5.02       | 7.04               | 8.04                     |

|    |                          |       |        |       |       |       |        |       |       |       |      |       |       |      |       |       |
|----|--------------------------|-------|--------|-------|-------|-------|--------|-------|-------|-------|------|-------|-------|------|-------|-------|
| 26 | Quanxiang 9A<br>×Giza179 | 79.85 | 109.33 | 42.03 | 20.21 | 68.13 | 99.11  | 27.00 | 10.00 | 2.04  | 26.1 | 79.82 | 7.02  | 6.82 | 7.04  | 8.04  |
| 27 | Quanxiang 9A<br>×Giza181 | 90.08 | 95.67  | 41.03 | 13.23 | 45.75 | 98.10  | 21.47 | 9.00  | 1.43  | 22.1 | 69.89 | 3.01  | 8.03 | 5.03  | 7.04  |
| 28 | Quanxiang 9A<br>×Giza182 | 81.17 | 110.05 | 41.03 | 38.00 | 60.67 | 99.40  | 27.18 | 12.83 | 4.13  | 27.1 | 89.80 | 10.03 | 8.13 | 9.05  | 9.05  |
| 29 | Quanxiang 9A<br>×GZ5121  | 82.16 | 105.00 | 42.63 | 13.23 | 70.17 | 100.00 | 26.00 | 10.67 | 2.53  | 26.1 | 79.82 | 8.73  | 6.82 | 8.04  | 8.04  |
|    | LSD 0.05                 | 1.108 | 2.225  | 0.699 | 0.557 | 2.033 | 0.157  | 0.424 | 0.536 | 0.231 | 0.03 | 0.735 | 0.126 | 0.12 | 0.007 | 0.005 |
|    | LSD 0.01                 | 1.47  | 2.96   | 0.93  | 0.74  | 2.71  | 0.21   | 0.56  | 0.71  | 0.31  | 0.03 | 0.98  | 0.17  | 0.16 | 0.012 | 0.013 |
